# Supplementary material for: Self-Powered Pressure–Temperature Bimodal Sensing Based on the Piezo-Pyroelectric Effect for Robotic Perception
Source: MDPI journal article supplement (doi:10.3390/s24092773), 2024-04-26
Supplement: s1 [file s1]

*Supplementary Materials for*

# **Self-Powered Pressure–Temperature Bimodal Sensing Based on the Piezo-Pyroelectric Effect for Robotic Perception**

**Xiang Yu** <sup>1,2,3</sup>, **Yun Ji** <sup>4,\*</sup>, **Xinyi Shen** <sup>1,2,3</sup> and **Xiaoyun Le** <sup>1,2,3,\*</sup>

<sup>1</sup> School of Physics, Beihang University, Beijing 100191, China

<sup>2</sup> Beijing Advanced Innovation Center for Big Data-Based Precision Medicine, School of Medicine and Engineering, Beihang University, Beijing 100191, China

<sup>3</sup> Beijing Key Laboratory of Advanced Nuclear Energy Materials and Physics, Beihang University, Beijing 100191, China

<sup>4</sup> Department of Electrical and Computer Engineering, National University of Singapore, 4 Engineering Drive 3, Singapore 117583, Singapore

\* Correspondence: jiyun@nus.edu.sg (Y.J.); xyle@buaa.edu.cn (X.L.)

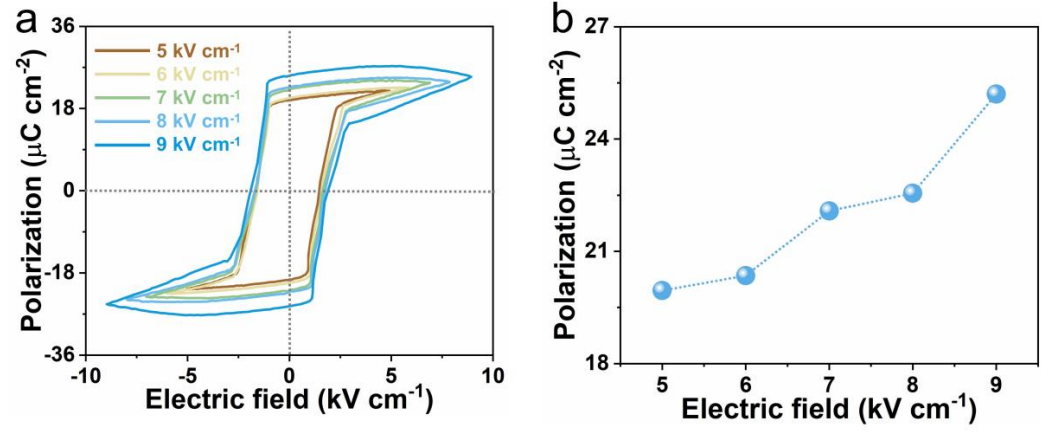

Figure S1. Ferroelectric properties of the PMN-PT single crystal. (a) *P-E* hysteresis loops of the PMN-PT. (b) Remnant polarization of the PMN-PT as a function of electric field.

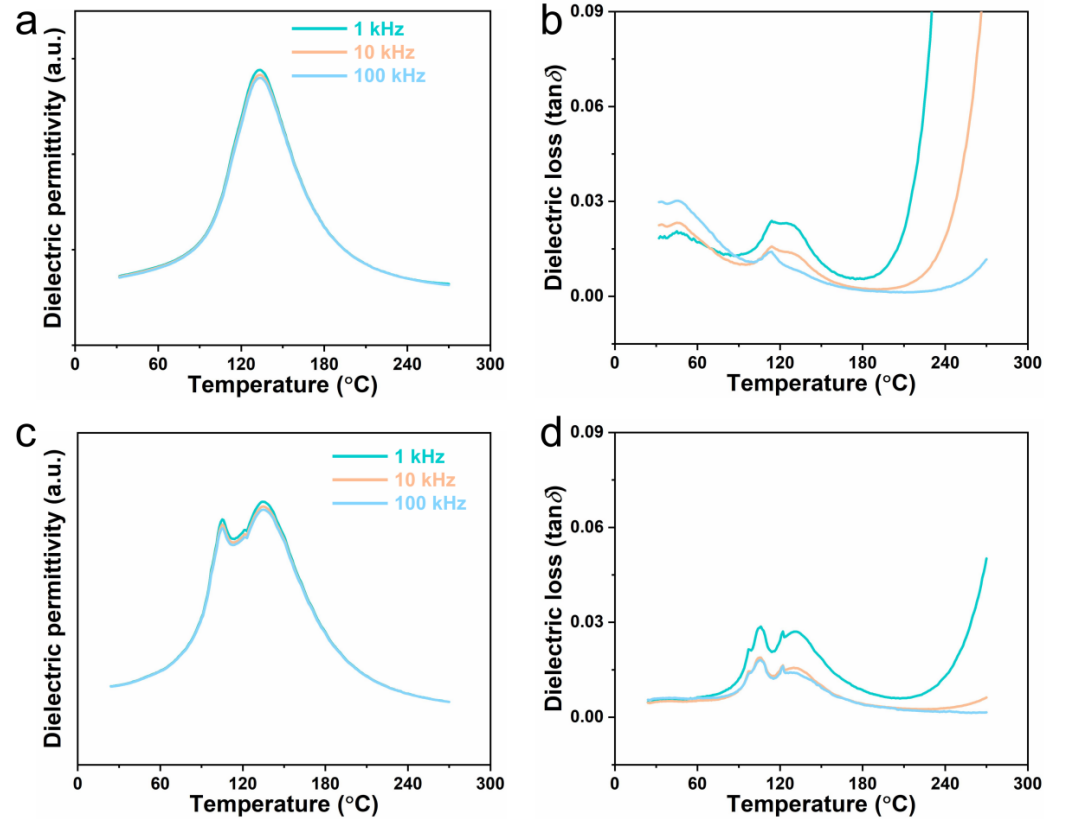

Figure S2. Dielectric properties of the PMN-PT single crystal. (a,b) Dielectric permittivity (a) and dielectric loss (b) of unpolarized PMN-PT. (c,d) Dielectric permittivity (c) and dielectric loss (d) of polarized PMN-PT.

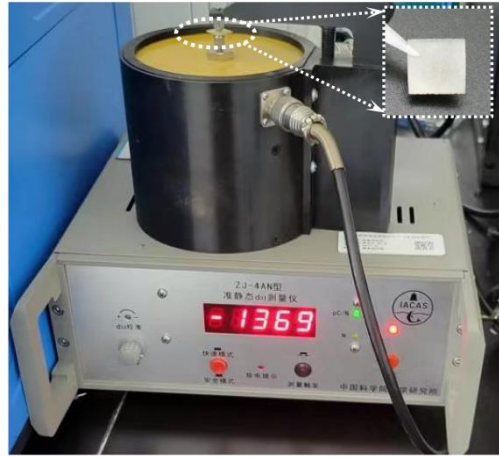

Figure S3. A photograph showing the piezoelectric constant  $d_{33}$  of the Ag/PMN-PT/Ag device.

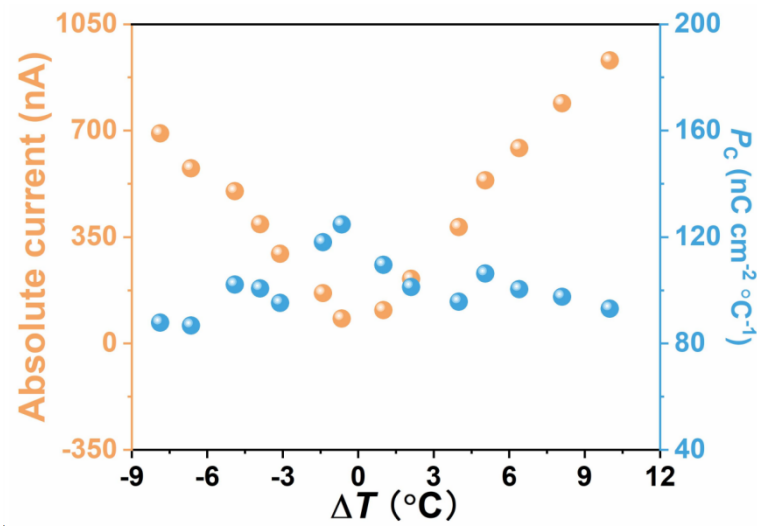

Figure S4. Absolute values of pyroelectric current and the corresponding pyroelectric coefficient  $P_c$  of the PMN-PT sensor as its temperature is changed by  $\Delta T$ .

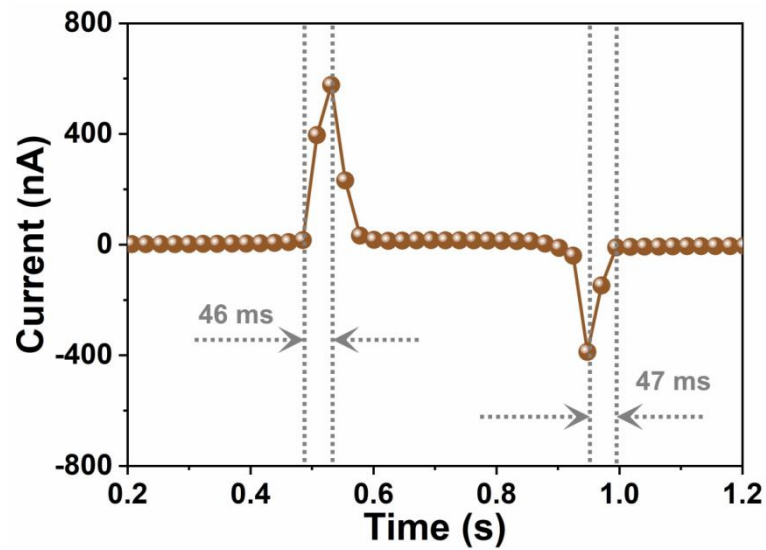

Figure S5. Response and recovery time of the PMN-PT bimodal sensor for pressure monitoring.

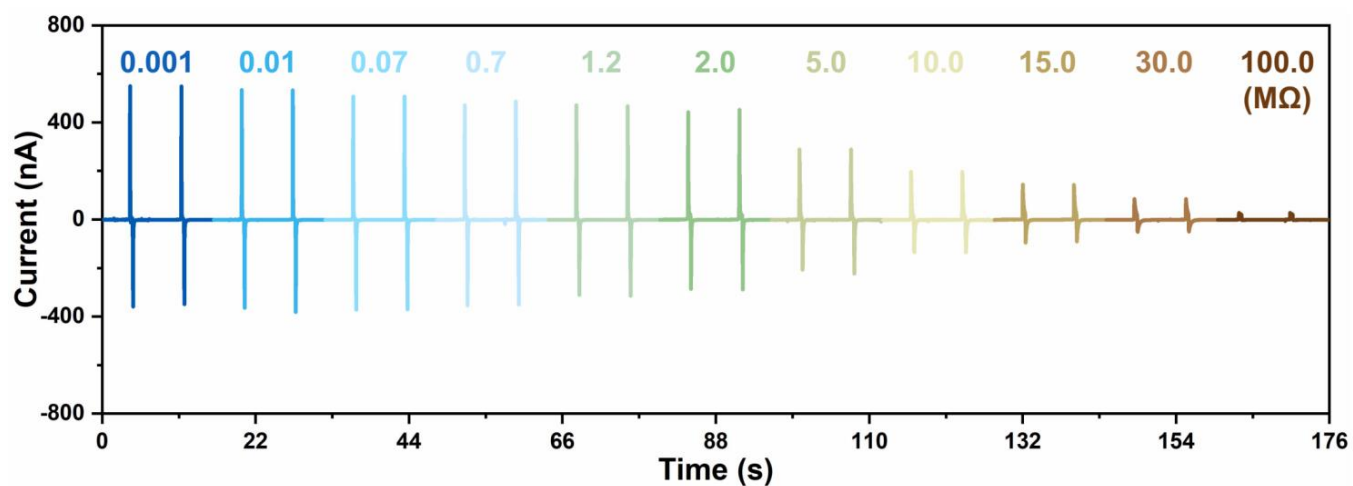

**Figure S6.** Piezoelectric current of the PMN-PT bimodal sensor with different external resistance.

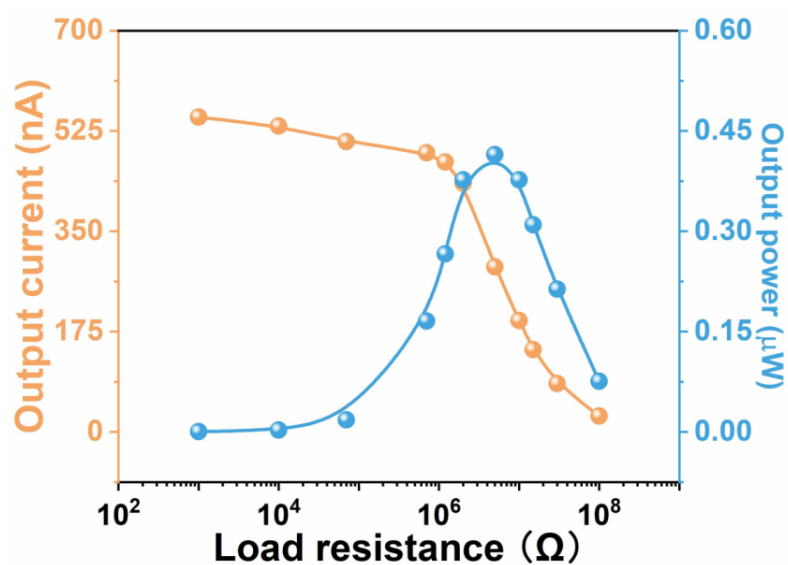

**Figure S7.** Dependence of the positive piezoelectric current and the corresponding output power of the PMN-PT bimodal sensor on the external resistance.

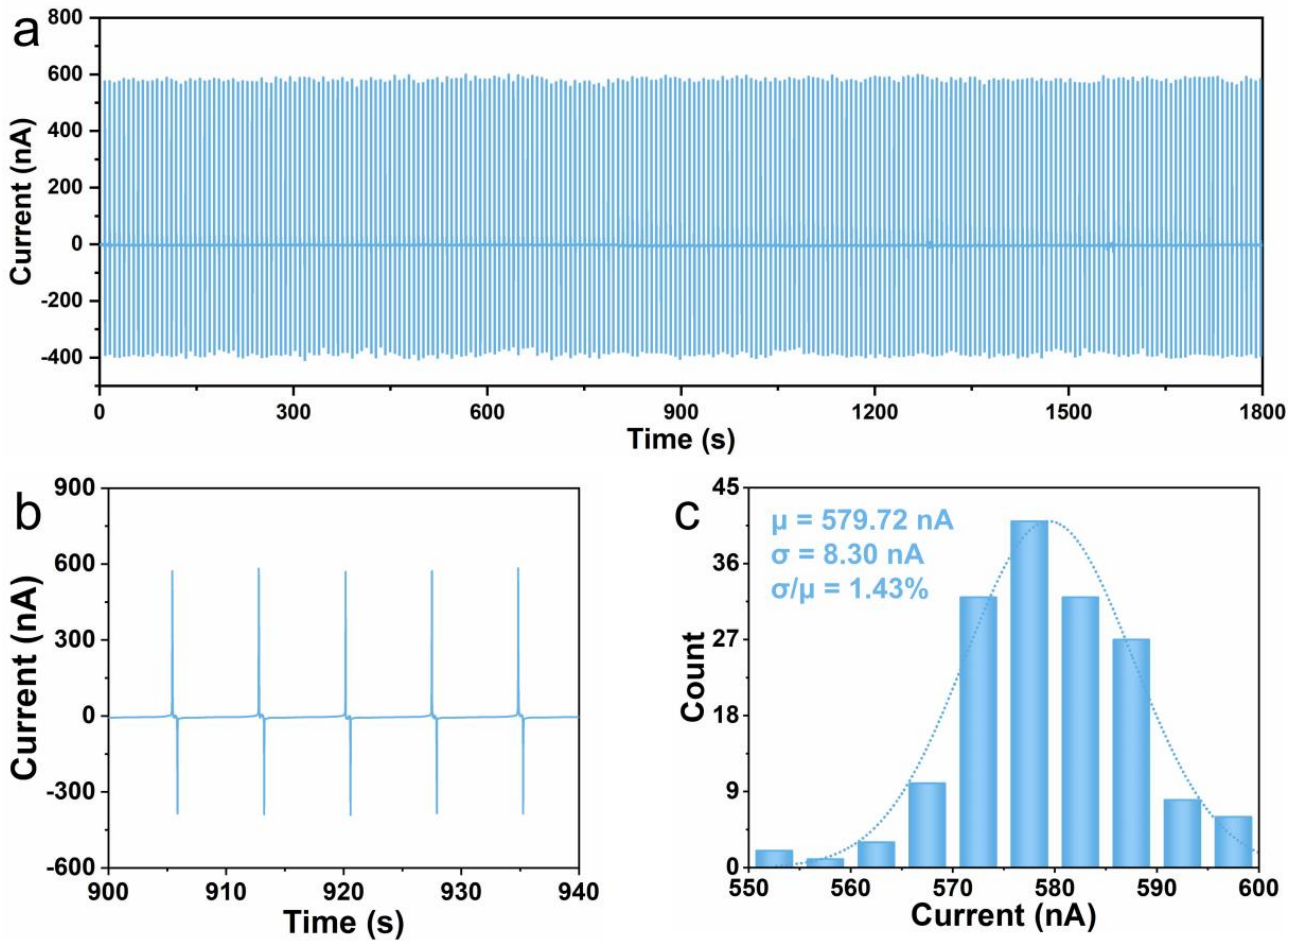

**Figure S8.** Long-term stability of the PMN-PT sensor for pressure monitoring. (a) Stability test of the PMN-PT sensor for pressure sensing under 125.6 kPa for 1800 s. (b) An enlarged part of the output current. (c) Statistical analysis of the cycle-to-cycle variability of the output current.

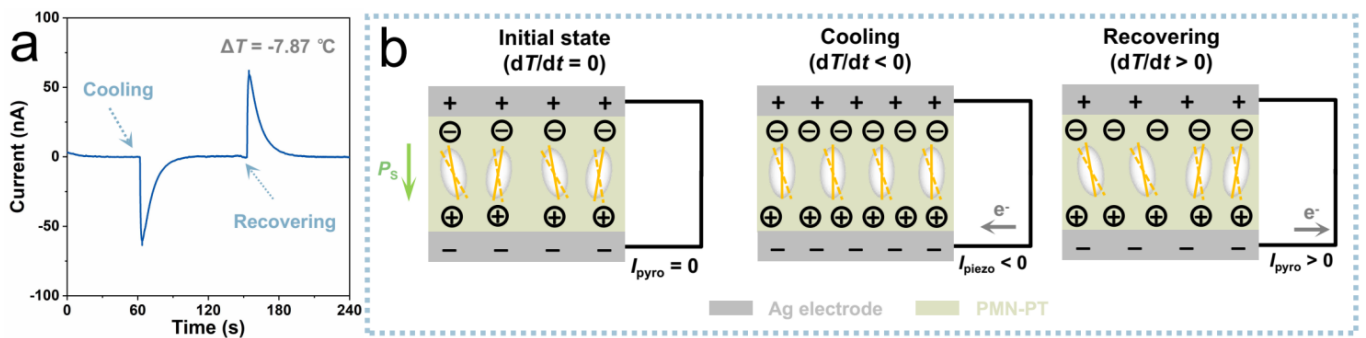

**Figure S9.** Working mechanism of the sensor under cooling condition. (a,b) A typical pyroelectric current signal of the sensor (a) and the corresponding current generation mechanism (b) under cooling stimuli with a temperature gradient  $\Delta T$  of  $-7.87$  °C.

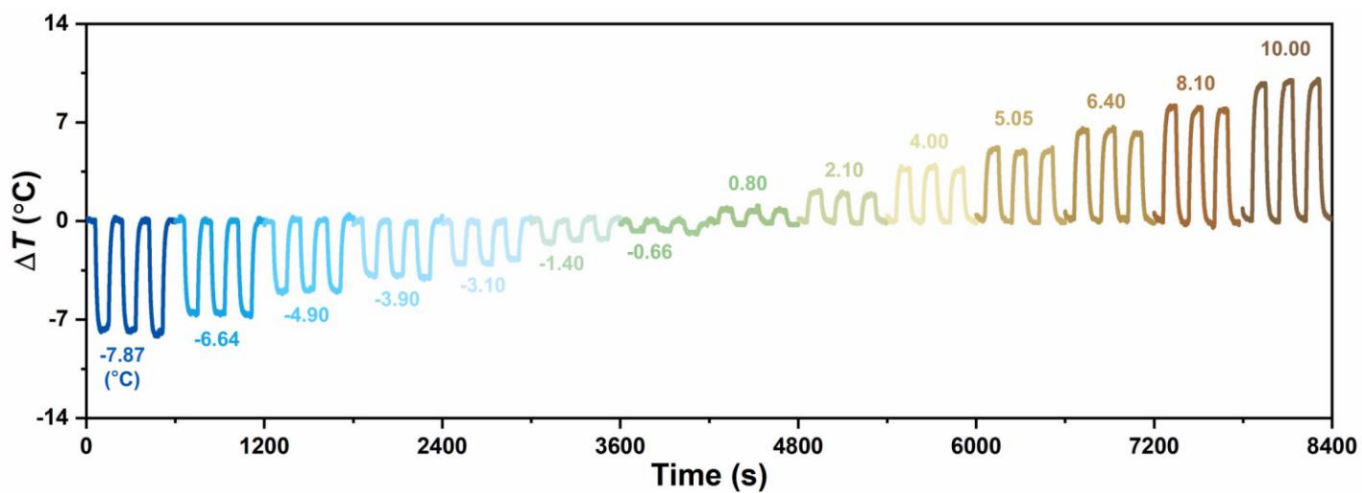

**Figure S10.** Time-dependent temperature gradient  $\Delta T$  exerted on the PMN-PT sensor (-7.8 °C to 10.00 °C).

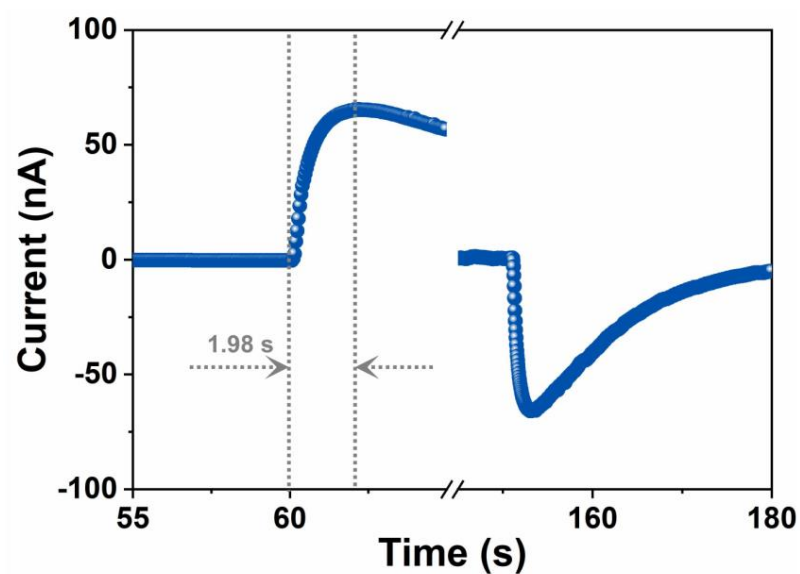

**Figure S11.** Response time of the PMN-PT sensor for temperature sensing.

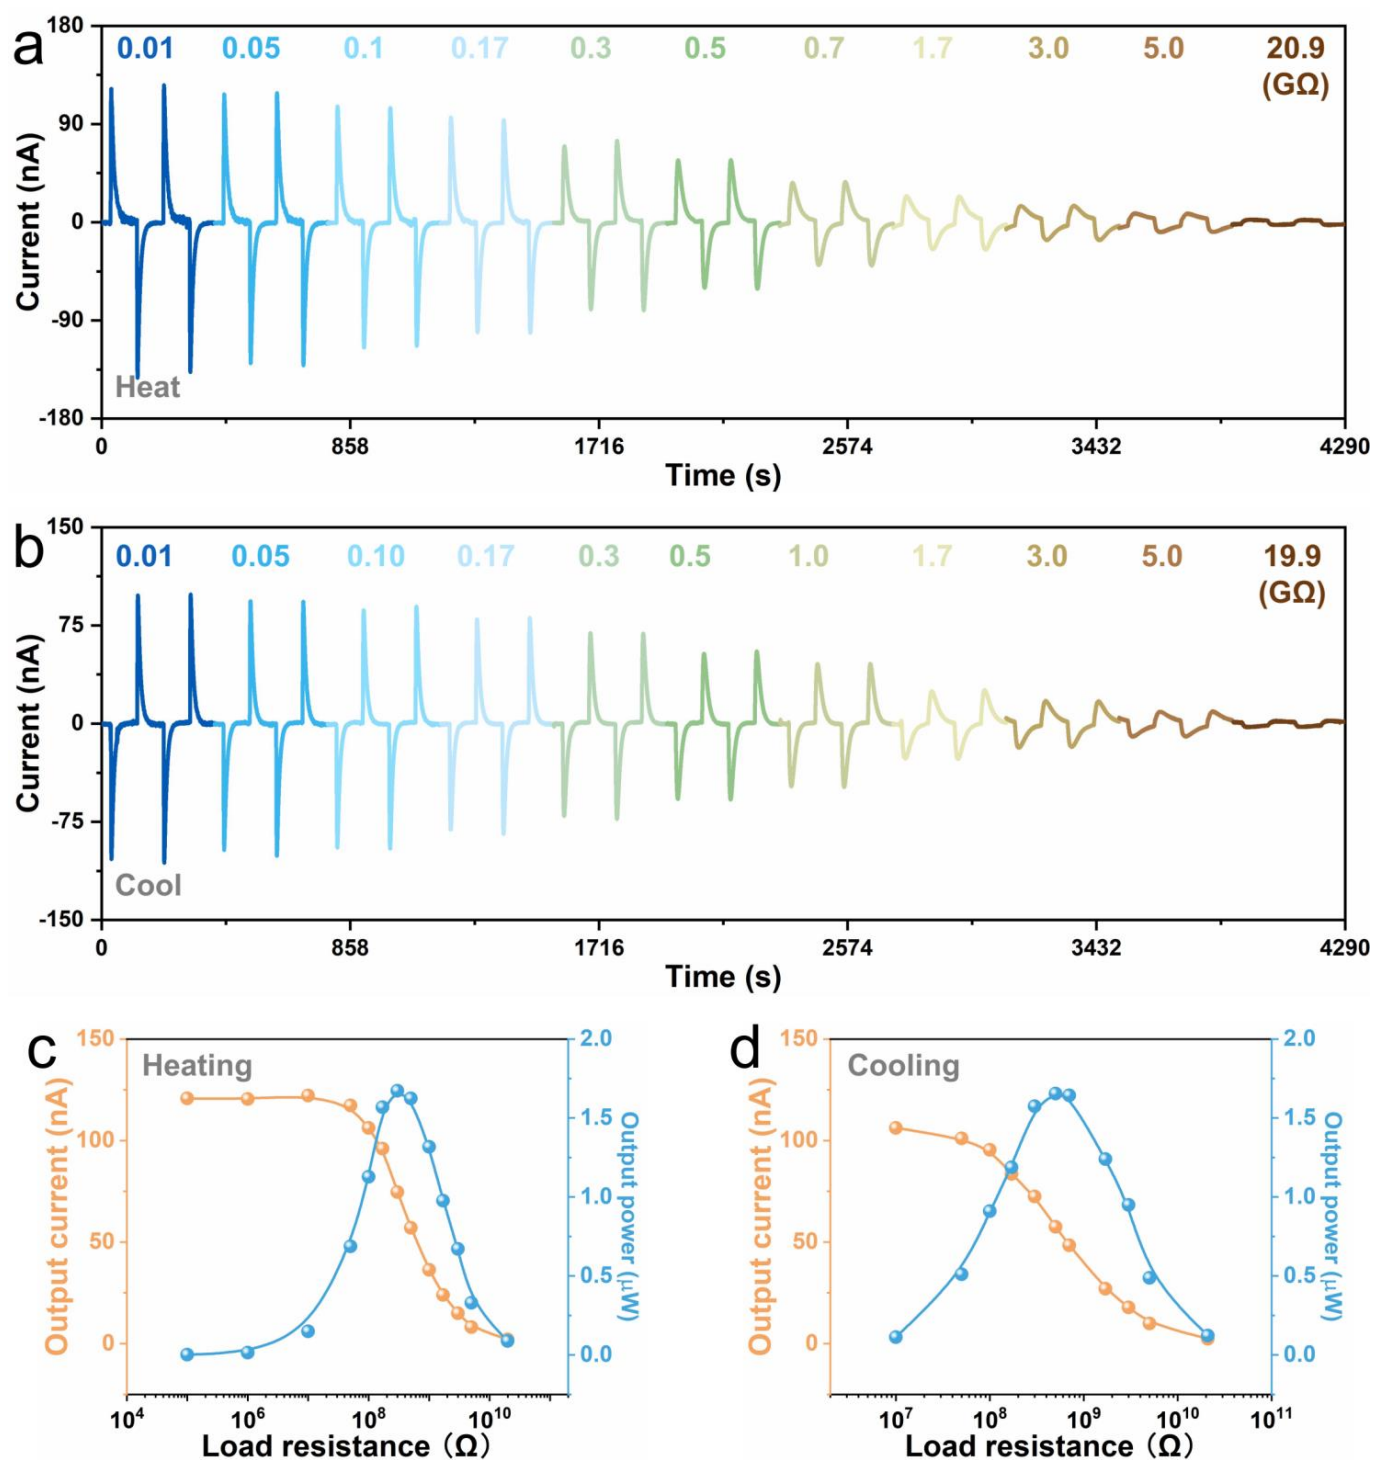

**Figure S12.** Electrical impedance of the bimodal PMN-PT sensor. (a,b) Pyroelectric current of the PMN-PT bimodal sensor with different external resistance under heating (a) and cooling (b) stimuli. (c,d) Dependence of the pyroelectric current signals and the corresponding output power of the PMN-PT bimodal sensor on resistance under heating (c) and cooling (d) stimuli.

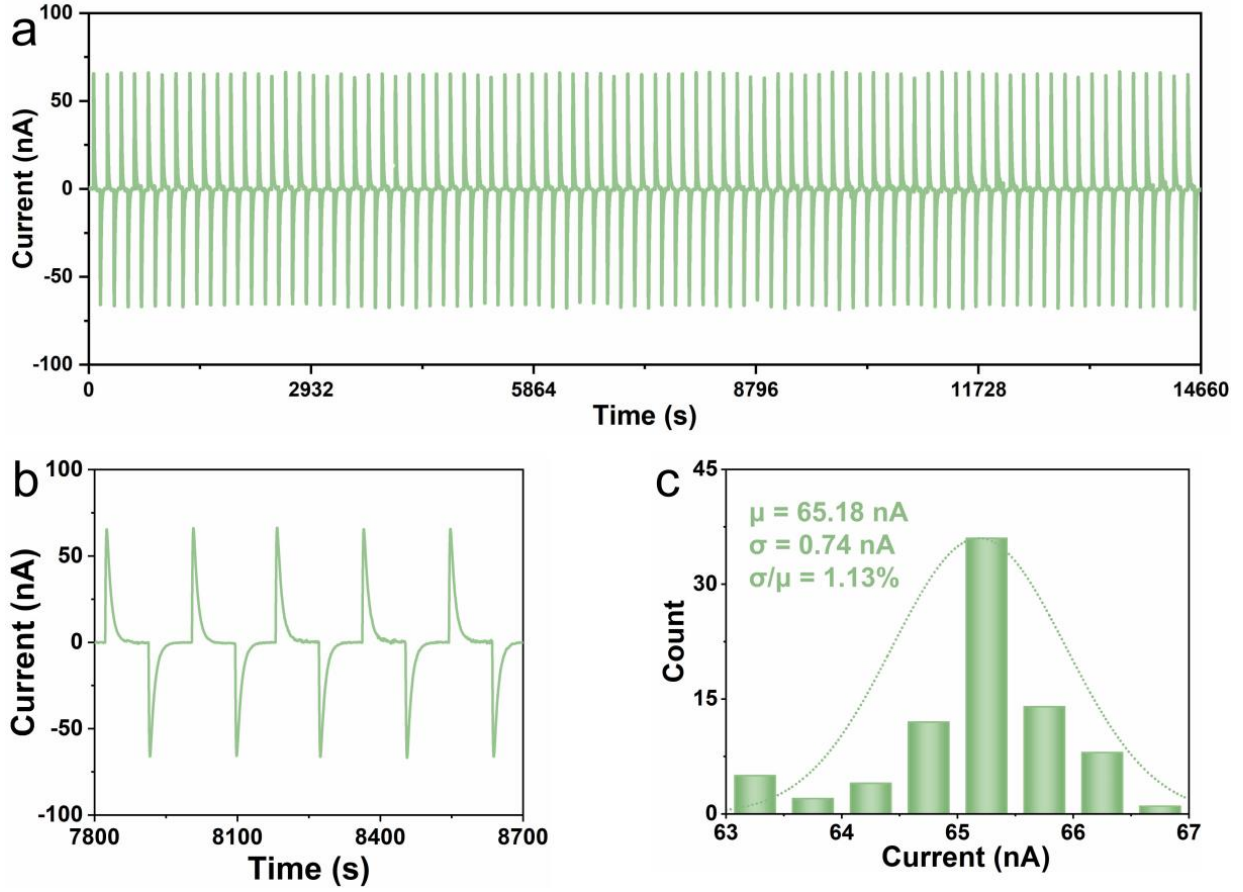

**Figure S13.** Long-term stability of the PMN-PT sensor for temperature monitoring. (a) Stability test of the PMN-PT sensor for temperature sensing under cyclical heating for 14660 s. (b) An enlarged portion of the output current. (c) Statistical analysis of the cycle-to-cycle variability of the output current.

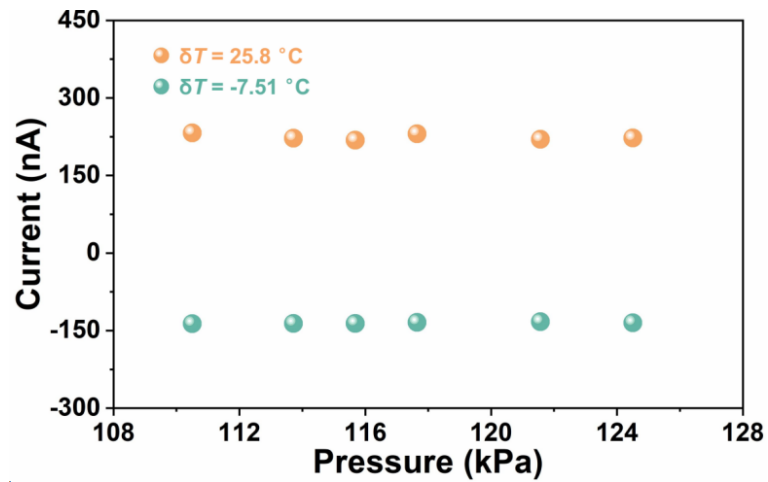

**Figure S14.** The plateau piezo-pyroelectric current  $I_2$  as a function of temperature under different pressures.



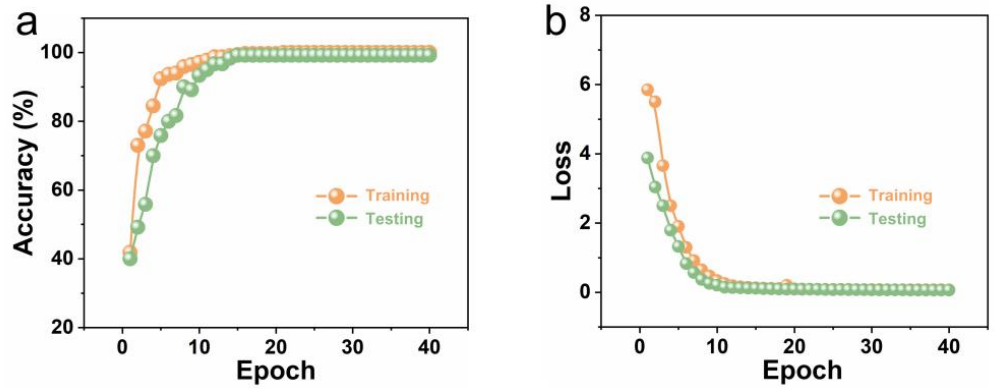

**Figure S15.** Dependence of stimuli classification accuracy and loss on epoch during training and testing. (a) Dependence of accuracy on epoch. (b) Dependence of loss on epoch.

**Table S1.** Comparisons of the sensitivities of ferroelectric pressure and temperature sensors.

| Materials                                                                                                                    | Operation mode                 | Pressure sensitivity<br>(nA kPa <sup>-1</sup> ) | Temperature sensitivity<br>( nA °C <sup>-1</sup> ) | Ref.      |
|------------------------------------------------------------------------------------------------------------------------------|--------------------------------|-------------------------------------------------|----------------------------------------------------|-----------|
| PMN-PT                                                                                                                       | Pressure & temperature sensing | 28.4                                            | 17.75                                              | This work |
| BaTiO <sub>3</sub>                                                                                                           | Pressure & temperature sensing | –                                               | 0.48                                               | [21]      |
| P(VDF-TrFE)                                                                                                                  | Pressure & temperature sensing | –                                               | 0.27                                               | [22]      |
| BaTiO <sub>3</sub>                                                                                                           | Pressure & temperature sensing | 1.43                                            | 8.85                                               | [25]      |
| P(VDF-TrFE)                                                                                                                  | Pressure & temperature sensing | 40                                              | 0.38                                               | [45]      |
| P(VDF-TrFE)                                                                                                                  | Pressure & temperature sensing | 4.6                                             | ~0.008                                             | [46]      |
| PVDF                                                                                                                         | Pressure sensing               | 11.9                                            | –                                                  | [47]      |
| Nylon-11                                                                                                                     | Pressure sensing               | $2.82 \times 10^{-3}$                           | –                                                  | [48]      |
| [C(NH <sub>2</sub> ) <sub>3</sub> ]ClO <sub>4</sub>                                                                          | Pressure sensing               | 20                                              | –                                                  | [49]      |
| P(VDF-TrFE)                                                                                                                  | Pressure sensing               | 12.4                                            | –                                                  | [50]      |
| BaTiO <sub>3</sub>                                                                                                           | Pressure sensing               | 0.2                                             | –                                                  | [51]      |
| 0.94(Bi <sub>0.5</sub> Na <sub>0.5</sub> )TiO <sub>3</sub> -<br>0.06Ba(Zr <sub>0.25</sub> Ti <sub>0.75</sub> )O <sub>3</sub> | Temperature sensing            | –                                               | 1.4                                                | [52]      |

## References

1. Han, Y.; Song, L.; Du, H.; Wang, G.; Zhang, T.; Ni, L.; Li, Y. Enhancing Structural Response via Macro-Micro Hierarchy for Piezoelectric Nanogenerator and Self-Powered Seizable Controller. *Chem. Eng. J.* **2024**, *481*, 148729.
2. Yan, D.; Wang, J.; Xiang, J.; Xing, Y.; Shao, L.-H. A Flexoelectricity-Enabled Ultrahigh Piezoelectric Effect of a Polymeric Composite Foam as a Strain-Gradient Electric Generator. *Sci. Adv.* **2023**, *9*, eadc8845.
3. Xu, Q.; Wang, Z.; Zhong, J.; Yan, M.; Zhao, S.; Gong, J.; Feng, K.; Zhang, J.; Zhou, K.; Xie, J.; et al. Construction of Flexible Piezoceramic Array with Ultrahigh Piezoelectricity via a Hierarchical Design Strategy. *Adv. Funct. Mater.* **2023**, *33*, 2304402.
4. Song, L.; Huang, Z.; Guo, S.; Li, Y.; Wang, Q. Hierarchically Architected Polyvinylidene Fluoride Piezoelectric Foam for Boosted Mechanical Energy Harvesting and Self-Powered Sensor. *ACS Appl. Mater. Interfaces* **2021**, *13*, 37252–37261.
5. Yan, M.; Zhong, J.; Liu, S.; Xiao, Z.; Yuan, X.; Zhai, D.; Zhou, K.; Li, Z.; Zhang, D.; Bowen, C.; et al. Flexible Pillar-Base Structured Piezocomposite with Aligned Porosity for Piezoelectric Energy Harvesting. *Nano Energy* **2021**, *88*, 106278.
6. Jiang, H.; Song, L.; Huang, Z.-X.; Liu, M.; Zhao, Y.; Zhang, S.; Guo, J.; Li, Y.; Wang, Q.; Qu, J.-P. A Novel Concept of Hierarchical Porous Structural Design on Enhancing Output Performance of Piezoelectric Nanogenerator. *Nano Energy* **2022**, *104*, 107921.
7. Li, G.-Y.; Li, J.; Li, Z.-J.; Zhang, Y.-P.; Zhang, X.; Wang, Z.-J.; Han, W.-P.; Sun, B.; Long, Y.-Z.; Zhang, H.-D. Hierarchical PVDF-HFP/ZnO Composite Nanofiber-based Highly Sensitive Piezoelectric Sensor for Wireless Workout Monitoring. *Adv. Compos. Hybrid. Mater.* **2022**, *5*, 766–775.
8. Zeng, W.; Deng, W.; Yang, T.; Wang, S.; Sun, Y.; Zhang, J.; Ren, X.; Jin, L.; Tang, L.; Yang, W. Gradient CNT/PVDF Piezoelectric Composite with Enhanced Force-Electric Coupling for Soccer Training. *Nano Res.* **2023**, *16*, 11312–11319.
9. Hong, Y.; Wang, B.; Long, Z.; Zhang, Z.; Pan, Q.; Liu, S.; Luo, X.; Yang, Z. Hierarchically Interconnected Piezoceramic Textile with a Balanced Performance in Piezoelectricity, Flexibility, Toughness, and Air Permeability. *Adv. Funct. Mater.* **2021**, *31*, 2104737.
10. Li, Y.; Sun, J.; Li, P.; Li, X.; Tan, J.; Zhang, H.; Li, T.; Liang, J.; Zhou, Y.; Hai, Z.; et al. High-Performance Piezoelectric Nanogenerators Based on Hierarchical ZnO@CF/PVDF Composite Film for Self-Powered Meteorological Sensor. *J. Mater. Chem. A* **2023**, *11*, 13708–13719.
11. Kim, D.W.; Kim, H.; Hwang, G.-T.; Cho, S.B.; Jeon, S.H.; Kim, H.W.; Jeong, C.K.; Chun, S.; Pang, C. Conformably Skin-Adherent Piezoelectric Patch with Bioinspired Hierarchically Arrayed Microsuckers Enables Physical Energy Amplification. *ACS Energy Lett.* **2022**, *7*, 1820–1827.
12. Fu, J.Y.; Zhu, W.; Li, N.; Smith, N.B.; Eric Cross, L. Gradient Scaling Phenomenon in Microsize Flexoelectric Piezoelectric Composites. *Appl. Phys. Lett.* **2007**, *91*, 182910.
13. Yang, T.; Deng, W.; Tian, G.; Deng, L.; Zeng, W.; Wu, Y.; Wang, S.; Zhang, J.; Lan, B.; Sun, Y.; et al. Modulating Piezoelectricity and Mechanical Strength via Three-Dimensional Gradient Structure for Piezoelectric Composites. *Mater. Horiz.* **2023**, *10*, 5045–5052.
14. Liu, H.; Lin, X.; Zhang, S.; Huan, Y.; Huang, S.; Cheng, X. Enhanced Performance of Piezoelectric Composite Nanogenerator Based on Gradient Porous PZT Ceramic Structure for Energy Harvesting. *J. Mater. Chem. A* **2020**, *8*, 19631–19640.
15. Malakooti, M.H.; Zhou, Z.; Spears, J.H.; Shankwitz, T.J.; Sodano, H.A. Biomimetic Nanostructured Interfaces for Hierarchical Composites. *Adv. Mater. Interfaces* **2016**, *3*, 1500404.
16. Gottscholl, A.; Diez, M.; Soltamov, V.; Kasper, C.; Krauß, D.; Sperlich, A.; Kianinia, M.; Bradac, C.; Aharonovich, I.; Dyakonov, V. Spin Defects in hBN as Promising Temperature, Pressure and Magnetic Field Quantum Sensors. *Nat. Commun.* **2021**, *12*, 4480.
17. Zhang, F.; Zang, Y.; Huang, D.; Di, C.-a.; Zhu, D. Flexible and Self-Powered Temperature-Pressure Dual-Parameter Sensors Using Microstructure-Frame-Supported Organic Thermoelectric Materials. *Nat. Commun.* **2015**, *6*, 8356.
18. Wang, Y.; Wu, H.; Xu, L.; Zhang, H.; Yang, Y.; Wang, Z.L. Hierarchically Patterned Self-Powered Sensors for Multifunctional Tactile Sensing. *Sci. Adv.* **2020**, *6*, eabb9083.
19. Wen, L.; Nie, M.; Wang, C.; Zhao, Y.-n.; Yin, K.; Sun, L. Multifunctional, Light-Weight Wearable Sensor Based on 3D Porous Polyurethane Sponge Coated with MXene and Carbon Nanotubes Composites. *Adv. Mater. Interfaces* **2022**, *9*, 2101592.
20. Fu, X.; Zhuang, Z.; Zhao, Y.; Liu, B.; Liao, Y.; Yu, Z.; Yang, P.; Liu, K. Stretchable and Self-Powered Temperature-Pressure Dual Sensing Ionic Skins Based on Thermogalvanic Hydrogels. *ACS Appl. Mater. Interfaces* **2022**, *14*, 44792–44798.
21. Ji, Y.; Wang, Y.; Yang, Y. Photovoltaic-Pyroelectric-Piezoelectric Coupled Effect Induced Electricity for Self-Powered Coupled Sensing. *Adv. Electron. Mater.* **2019**, *5*, 1900195.
22. Shin, Y.-E.; Park, Y.-J.; Ghosh, S.K.; Lee, Y.; Park, J.; Ko, H. Ultrasensitive Multimodal Tactile Sensors with Skin-Inspired Microstructures through Localized Ferroelectric Polarization. *Adv. Sci.* **2022**, *9*, 2105423.
23. Park, J.; Kim, M.; Lee, Y.; Lee, H.S.; Ko, H. Fingertip Skin-Inspired Microstructured Ferroelectric Skins Discriminate Static/Dynamic Pressure and Temperature Stimuli. *Sci. Adv.* **2015**, *1*, e1500661.
24. Zhu, P.; Wang, Y.; Wang, Y.; Mao, H.; Zhang, Q.; Deng, Y. Flexible 3D Architected Piezo/Thermoelectric Bimodal Tactile Sensor Array for E-Skin Application. *Adv. Energy Mater.* **2020**, *10*, 2001945.
25. Zhao, K.; Ouyang, B.; Bowen, C.R.; Wang, Z.L.; Yang, Y. One-Structure-Based Multi-effects Coupled Nanogenerators for Flexible and Self-Powered Multi-Functional Coupled Sensor Systems. *Nano Energy* **2020**, *71*, 104632.
26. Ghosh, S.K.; Park, J.; Na, S.; Kim, M.P.; Ko, H. A Fully Biodegradable Ferroelectric Skin Sensor from Edible Porcine Skin Gelatine. *Adv. Sci.* **2021**, *8*, 2005010.
27. Zirkl, M.; Sawatdee, A.; Helbig, U.; Krause, M.; Scheipl, G.; Kraker, E.; Ersman, P.A.; Nilsson, D.; Platt, D.; Bodö, P.; et al. An All-Printed Ferroelectric Active Matrix Sensor Network Based on Only Five Functional Materials Forming a Touchless Control Interface. *Adv. Mater.* **2011**, *23*, 2069–2074.

28. Roy, K.; Ghosh, S.K.; Sultana, A.; Garain, S.; Xie, M.; Bowen, C.R.; Henkel, K.; Schmeißer, D.; Mandal, D. A Self-Powered Wearable Pressure Sensor and Pyroelectric Breathing Sensor Based on GO Interfaced PVDF Nanofibers. *ACS Appl. Nano Mater.* **2019**, *2*, 2013–2025.
29. Ali, T.A.; Groten, J.; Clade, J.; Collin, D.; Schäffner, P.; Zirkel, M.; Coclite, A.-M.; Domann, G.; Stadlober, B. Screen-Printed Ferroelectric P(VDF-TrFE)-co-PbTiO<sub>3</sub> and P(VDF-TrFE)-co-NaBiTiO<sub>6</sub> Nanocomposites for Selective Temperature and Pressure Sensing. *ACS Appl. Mater. Interfaces* **2020**, *12*, 38614–38625.
30. Lee, J.-H.; Lee, K.Y.; Gupta, M.K.; Kim, T.Y.; Lee, D.-Y.; Oh, J.; Ryu, C.; Yoo, W.J.; Kang, C.-Y.; Yoon, S.-J.; et al. Highly Stretchable Piezoelectric-Pyroelectric Hybrid Nanogenerator. *Adv. Mater.* **2014**, *26*, 765–769.
31. Yao, K.; Chen, S.; Lai, S.C.; Yousry, Y.M. Enabling Distributed Intelligence with Ferroelectric Multifunctionalities. *Adv. Sci.* **2022**, *9*, 2103842.
32. Song, K.; Zhao, R.; Wang, Z.L.; Yang, Y. Conjoined Pyro-Piezoelectric Effect for Self-Powered Simultaneous Temperature and Pressure Sensing. *Adv. Mater.* **2019**, *31*, 1902831.
33. Chen, C.; Wang, Y.; Li, J.; Wu, C.; Yang, G. Piezoelectric, Ferroelectric and Pyroelectric Properties of (100-x)Pb(Mg<sub>1/3</sub>Nb<sub>2/3</sub>)O<sub>3</sub>-xPbTiO<sub>3</sub> Ceramics. *J. Adv. Dielectr.* **2022**, *12*, 2250002.
34. Kelly, J.; Leonard, M.; Tantigate, C.; Safari, A. Effect of Composition on the Electromechanical Properties of (1-x)Pb(Mg<sub>1/3</sub>Nb<sub>2/3</sub>)O<sub>3</sub>-xPbTiO<sub>3</sub> Ceramics. *J. Am. Ceram. Soc.* **1997**, *80*, 957–964.
35. Feng, Z.; Li, H.; Luo, H.; Jin, W. High Electric-Field-Induced Strain Behavior of Single-Crystal Pb(Mg<sub>1/3</sub>Nb<sub>2/3</sub>)O<sub>3</sub>-xPbTiO<sub>3</sub> Multilayer Piezoelectric Actuators. *J. Electron. Mater.* **2005**, *34*, 1035–1039.
36. Luo, N.; Zhang, S.; Li, Q.; Yan, Q.; He, W.; Zhang, Y.; Shrout, T.R. PMN-PT Based Quaternary Piezoceramics with Enhanced Piezoelectricity and Temperature Stability. *Appl. Phys. Lett.* **2014**, *104*, 182911.
37. Lv, P.; Qian, J.; Yang, C.; Liu, T.; Wang, Y.; Wang, D.; Huang, S.; Cheng, X.; Cheng, Z. Flexible All-Inorganic Sm-Doped PMN-PT Film with Ultrahigh Piezoelectric Coefficient for Mechanical Energy Harvesting, Motion Sensing, and Human-Machine Interaction. *Nano Energy* **2022**, *97*, 107182.
38. Chen, Y.; Zhang, Y.; Yuan, F.; Ding, F.; Schmidt, O.G. A Flexible PMN-PT Ribbon-Based Piezoelectric-Pyroelectric Hybrid Generator for Human-Activity Energy Harvesting and Monitoring. *Adv. Electron. Mater.* **2017**, *3*, 1600540.
39. Bowen, C.R.; Taylor, J.; LeBoulbar, E.; Zabeck, D.; Chauhan, A.; Vaish, R. Pyroelectric Materials and Devices for Energy Harvesting Applications. *Energ. Environ. Sci.* **2014**, *7*, 3836–3856.
40. Zhao, J.; Zhu, R.; Chen, J.; Zhang, M.; Feng, P.; Jiao, J.; Wang, X.a.; Luo, H. Enhanced Temperature Stability of Compensated Pyroelectric Infrared Detector based on Mn:PMN-PT Single Crystals. *Sensor. Actuat. A-Phys.* **2021**, *327*, 112757.
41. Kandilian, R.; Navid, A.; Pilon, L. The Pyroelectric Energy Harvesting Capabilities of PMN-PT near the Morphotropic Phase Boundary. *Smart Mater. Struct.* **2011**, *20*, 055020.
42. Zhao, X.; Dai, J.Y.; Wang, J.; Chan, H.L.W.; Choy, C.L.; Wan, X.M.; Luo, H.S. Relaxor Ferroelectric Characteristics and Temperature-Dependent Domain Structure in a (110)-Cut (PbMg<sub>1/3</sub>Nb<sub>2/3</sub>)<sub>0.75</sub>(PbTiO<sub>3</sub>)<sub>0.25</sub> Single Crystal. *Phys. Rev. B* **2005**, *72*, 064114.
43. Wu, N.; Song, X.; Hou, Y.; Zhu, M.; Wang, C.; Yan, H. Relaxor Behavior of (1-x)Pb(Mg<sub>1/3</sub>Nb<sub>2/3</sub>)O<sub>3</sub>-xPbTiO<sub>3</sub> Ceramics. *Chin. Sci. Bull.* **2009**, *54*, 1267–1274.
44. Ma, N.; Zhang, K.; Yang, Y. Photovoltaic-Pyroelectric Coupled Effect Induced Electricity for Self-Powered Photodetector System. *Adv. Mater.* **2017**, *29*, 1703694.
45. Shin, Y.-E.; Sohn, S.-D.; Han, H.; Park, Y.; Shin, H.-J.; Ko, H. Self-Powered Triboelectric/Pyroelectric Multimodal Sensors with Enhanced Performances and Decoupled Multiple Stimuli. *Nano Energy* **2020**, *72*, 104671.
46. Liu, W.; Lin, D.; Zeng, W.; Wang, Q.; Yang, J.; Peng, Z.; Zhang, Q.; Zhu, G. A Multifunctional Flexible Ferroelectric Transistor Sensor for Electronic Skin. *Adv. Mater. Interfaces* **2021**, *8*, 2101166.
47. Kim, J.; Jang, M.; Jeong, G.; Yu, S.; Park, J.; Lee, Y.; Cho, S.; Yeom, J.; Lee, Y.; Choe, A.; Kim, Y.-R.; Yoon, Y.; Lee, S. S.; An, K.-S.; Ko, H. MXene-Enhanced  $\beta$ -Phase Crystallization in Ferroelectric Porous Composites for Highly-Sensitive Dynamic Force Sensors. *Nano Energy* **2021**, *89*, 106409.
48. Eom, K.; Na, S.; Kim, J.-K.; Ko, H.; Jin, J.; Kang, S. J. Engineering Crystal Phase of Nylon-11 Films for Ferroelectric Device and Piezoelectric Sensor. *Nano Energy* **2021**, *88*, 106244.
49. Li, W.; Li, C.; Zhang, G.; Li, L.; Huang, K.; Gong, X.; Zhang, C.; Zheng, A.; Tang, Y.; Wang, Z.; Tong, Q.; Dong, W.; Jiang, S.; Zhang, S.; Wang, Q. Molecular Ferroelectric-Based Flexible Sensors Exhibiting Supersensitivity and Multimodal Capability for Detection. *Adv. Mater.* **2021**, *33*, 2104107.
50. Eom, K.; Shin, Y.-E.; Kim, J.-K.; Joo, S. H.; Kim, K.; Kwak, S. K.; Ko, H.; Jin, J.; Kang, S. J. Tailored Poly(vinylidene fluoride-co-trifluoroethylene) Crystal Orientation for a Triboelectric Nanogenerator through Epitaxial Growth on a Chitin Nanofiber Film. *Nano Letters* **2020**, *20*, 6651–6659.
51. Zhou, B.; Li, C.; Zhou, Y.; Liu, Z.; Gao, X.; Wang, X.; Jiang, L.; Tian, M.; Zhou, F.-L.; Jerrams, S.; Yu, J. A Flexible Dual-Mode Pressure Sensor with Ultra-High Sensitivity based on BTO@MWCNTs Core-Shell Nanofibers. *Compos. Sci. Technol.* **2022**, *224*, 109478.
52. Zhao, K.; Zhang, H.; Meng, J.; Chung, C.-C.; Gu, B.-N.; Liu, M.-J.; Zhang, D.; Zhong, M.; Liu, M.; Liu, N.; Lin, C.-J.; Meng, C.; Chueh, Y.-L. Design of Self-Powered Sensors with Excellent Thermal and UV-Light Detections by 0.94(Bi<sub>0.5</sub>Na<sub>0.5</sub>)TiO<sub>3</sub>-0.06Ba(Zr<sub>0.25</sub>Ti<sub>0.75</sub>)O<sub>3</sub> Nanoparticles. *Adv. Funct. Mater.* **2022**, *32*, 2204234.
